# Supplementary material for: Causal Association between Periodontitis and Parkinson's Disease: A Bidirectional Mendelian Randomization Study
Source: Preprints.org preprint supplement (doi:10.20944/preprints202010.0145.v1), 2020-10-07
Supplement: Supplementary file 1 [file Appendix S1.docx]

**S1 Table.** **Summary statistics for Mendelian randomization analysis of potential causal effect of periodontitis on Parkinson’s disease**

| SNP | Chr | Nearest genes/contig | Alleles: effect/other | Eaf† | Exposure: Periodontitis | | | Outcome: PD  (20.184 cases and 397,324 controls) [1] | | |
| --- | --- | --- | --- | --- | --- | --- | --- | --- | --- | --- |
| Coefficient# | SE | *P* value | Coefficient# | SE | *P* value |
| Teumer *et al.* [2] (1,817 periodontitis cases vs. 2,215 controls) | | | | | | | | | | |
| rs111571364 | 2 | GPN1 | T / G | 0.02 | 1.24 | 0.2777 | 8.00E-06 | 0.0002 | 0.0015 | 0.89 |
| rs12048046 | 1 | ACTN2 | T / C | 0.90 | 0.42 | 0.0884 | 3.00E-06 | 0.0004 | 0.0006 | 0.50 |
| rs12587630 | 14 | FOXA1 | A / G | 0.98 | 0.99 | 0.2203 | 7.00E-06 | -0.0013 | 0.0011 | 0.22 |
| rs13237474 | 7 | FAM180A | T / C | 0.03 | 1.12 | 0.2152 | 2.00E-07 | -0.0018 | 0.0011 | 0.10 |
| rs1953021 | 9 | C9orf150 | T / G | 0.71 | 0.30 | 0.0620 | 1.00E-06 | -0.0004 | 0.0004 | 0.33 |
| rs2009196 | 17 | TIMP2 | C / G | 0.23 | 0.34 | 0.0723 | 2.00E-06 | 0.0001 | 0.0004 | 0.77 |
| rs263063 | 19 | JMJD2B | T / C | 0.08 | 0.49 | 0.1073 | 6.00E-06 | -0.0004 | 0.0006 | 0.51 |
| rs28455997 | 8 | CSMD1 | T / C | 0.84 | 0.39 | 0.0838 | 3.00E-06 | 0.0001 | 0.0005 | 0.83 |
| rs28643277 ¥ | 10 | ITGA8 | A / C | 0.35 | 0.28 | 0.0634 | 9.00E-06 | -0.0001 | 0.0004 | 0.70 |
| rs3128935 | 6 | HLA-DOA | T / C | 0.97 | 0.82 | 0.1847 | 9.00E-06 | -0.0015 | 0.0010 | 0.15 |
| rs6497031 | 15 | RGMA | G / A | 0.83 | -0.61 | 0.1346 | 5.00E-06 | 0.0003 | 0.0005 | 0.56 |
| rs6890783 | 5 | ERGIC1 | A / G | 0.01 | 1.86 | 0.4093 | 5.00E-06 | -0.0002 | 0.0016 | 0.89 |
| rs72899866 | 2 | LRP1B | A / T | 0.22 | 0.33 | 0.0713 | 5.00E-06 | 0.0002 | 0.0004 | 0.58 |
| rs73389468 | 10 | C10orf91 | C / T | 0.98 | 1.02 | 0.2323 | 9.00E-06 | 0.0015 | 0.0014 | 0.29 |
| rs7819988 | 8 | SNTB1 | T / C | 0.55 | 0.28 | 0.0600 | 3.00E-06 | 0.0003 | 0.0004 | 0.37 |
| rs78411303 | 3 | PARP15 | A / G | 0.094 | 0.67 | 0.1415 | 3.00E-06 | -0.0008 | 0.0007 | 0.27 |
| rs78797168 | 6 | IGF2R | A / G | 0.93 | 0.56 | 0.1194 | 2.00E-06 | 0.0004 | 0.0007 | 0.52 |
| Munz *et al.* [3] (4,924 periodontitis cases vs. 7,301 controls) | | | | | | | | | | |
| rs11084095 | 19 | SIGLEC5, AC018755.2 | G / A | 0.59 | -1.17 | 0.030612 | 5,00E-08 | -0.0003 | 0.00036 | 0.38 |
| rs3780866 | 10 | NUDT5 | G / A | 0.89 | 1.17 | 0.040816 | 8,00E-06 | -0.0001 | 0.00042 | 0.83 |
| rs6725179 | 21 | RNU6-675P, TEX51 | G / A | 0.66 | -1.15 | 0.035714 | 3,00E-06 | -0.0003 | 0.00037 | 0.38 |
| rs7031401 | - | LINC01239, AL391117.1 | A / G | 0.92 | -1.27 | 0.061224 | 6,00E-06 | -0.0003 | 0.00065 | 0.60 |
| rs729876 | 16 | U91319.1 | T / C | 0.80 | 1.23 | 0.040816 | 1,00E-08 | 0.0000 | 0.00044 | 0.94 |
| rs886431 | 12 | AC004241.1 | G / A | 0.09 | 1.19 | 0.045918 | 4,00E-06 | -0.0005 | 0.00047 | 0.26 |
| rs9982623 | 21 | MCM3AP | C / T | 0.86 | 1.23 | 0.05102 | 9,00E-07 | -0.0002 | 0.00053 | 0.70 |
| rs9992954 | 4 | MIR297, LYPLA1P2 | C / T | 0.84 | -1.18 | 0.040816 | 9,00E-06 | 0.0005 | 0.00046 | 0.31 |

PD: Parkinson’s disease; Chr: chromosome; Eaf: effect allele frequency; SE: standard error; SNP: single-nucleotide polymorphism

Seventeen/eight SNPs in two GWAS were used as instrumental variables for chronic periodontitis respectively.

¥rs28643277 (A / C) was used as proxy SNP (linkage disequilibrium R2>0.8).

**References**

1. Chang, D.; Nalls, M.A.; Hallgrímsdóttir, I.B.; Hunkapiller, J.; Brug, M. van der; Cai, F.; Kerchner, G.A.; Ayalon, G.; Bingol, B.; Sheng, M.; et al. A meta-analysis of genome-wide association studies identifies 17 new Parkinson’s disease risk loci. *Nat. Genet.* **2017**, *49*, 1511–1516.

2. Teumer, A.; Holtfreter, B.; Völker, U.; Petersmann, A.; Nauck, M.; Biffar, R.; Völzke, H.; Kroemer, H.K.; Meisel, P.; Homuth, G.; et al. Genome-wide association study of chronic periodontitis in a general German population. *J. Clin. Periodontol.* **2013**, *40.* 977–985.

3. Munz, M.; Richter, G.M.; Loos, B.G.; Jepsen, S.; Divaris, K.; Offenbacher, S.; Teumer, A.; Holtfreter, B.; Kocher, T.; Bruckmann, C.; et al. Meta-analysis of genome-wide association studies of aggressive and chronic periodontitis identifies two novel risk loci. *Eur. J. Hum. Genet.* **2019**, *27*, 102–113.
