# Supplementary figures and images for: Causal Association between Periodontitis and Parkinson's Disease: A Bidirectional Mendelian Randomization Study
Source: Preprints.org preprint supplement (doi:10.20944/preprints202010.0145.v1), 2020-10-07

**S3. Leave-one-out meta-analysis for (A) Munz et al., (B) Teumer et al. and (C) Chang et al.**


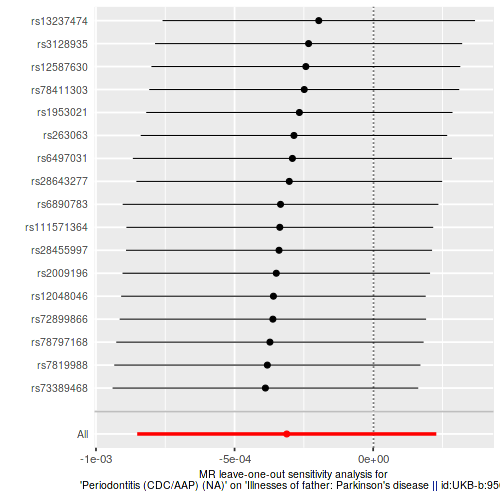


A)


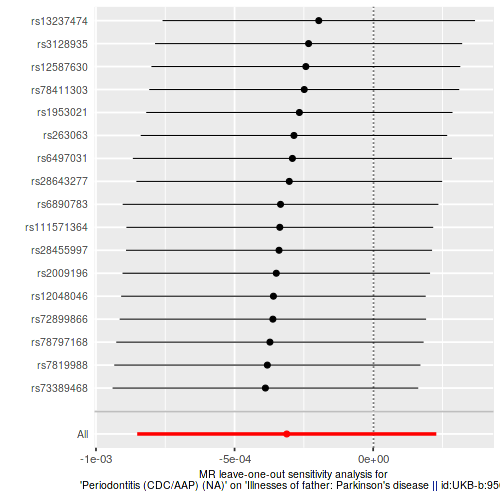
**B)**


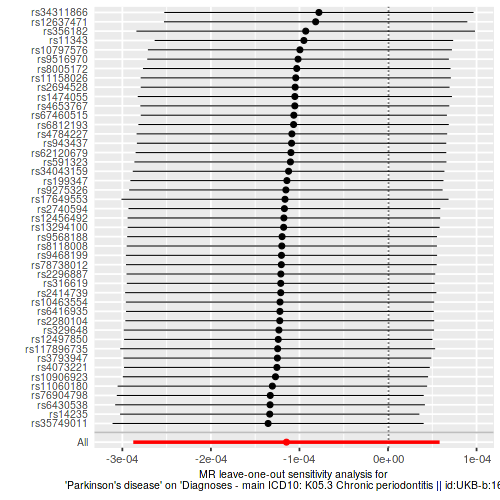
**C)**

Supplement: Supplementary file 3 [file Appendix S3.docx]
